# Supplementary material for: MetAMDB: Metabolic Atom Mapping Database
Source: MDPI journal article supplement (doi:10.3390/metabo12020122), 2022-01-27
Supplement: s1 [file s1]

# MetAMDB: Metabolic Atom Mapping Database

*Collin Starke<sup>1</sup>, and Andre Wegner<sup>1\*</sup>*

(1) Department of Bioinformatics and Biochemistry, Braunschweig Integrated Center of Systems Biology (BRICS), Technische Universität Braunschweig, Rebenring 56, 38106 Braunschweig, Germany

(\*) To whom correspondence should be addressed ([a.wegner@tu-bs.de](mailto:a.wegner@tu-bs.de))

This document contains the following information in support of the primary article:

## Method Text: Flux estimation and MID simulation

All flux estimations and MID simulations were done in INCA (Young, 2014) for the provided *E. coli* model (Young et al., 2008). The model is a dynamic, nonsteady-state model and was used with its predetermined settings by INCA. For the flux set, fluxes were estimated and for the confidence interval calculation the INCA parameter continuation was used. Since the model is dynamic, multiple MIDs were simulated but only the last time point was used in this paper (0.0178).

Table S1: Atom mapping model of the INCA *E. coli* model (Young, 2014).

| ID  | Substrates                                                    |     | Products                                          |
|-----|---------------------------------------------------------------|-----|---------------------------------------------------|
| R1  | G6P (abcdef)                                                  | <-> | F6P (abcdef)                                      |
| R2  | F6P (abcdef)                                                  | ->  | FBP (abcdef)                                      |
| R3  | FBP (abcdef)                                                  | <-> | DHAP (cba) + GAP (def)                            |
| R4  | DHAP (abc)                                                    | <-> | GAP (abc)                                         |
| R5  | GAP (abc)                                                     | <-> | PG3 (abc)                                         |
| R6  | PG3 (abc)                                                     | <-> | PEP (abc)                                         |
| R7  | PEP (abc)                                                     | ->  | Pyr (abc)                                         |
| R8  | G6P (abcdef)                                                  | ->  | PG6 (abcdef)                                      |
| R9  | PG6 (abcdef)                                                  | ->  | Ru5P (bcdef) + CO2 (a)                            |
| R10 | Ru5P (abcde)                                                  | <-> | X5P (abcde)                                       |
| R11 | Ru5P (abcde)                                                  | <-> | R5P (abcde)                                       |
| R12 | X5P (abcde)                                                   | <-> | GAP (cde) + EC2 (ab)                              |
| R13 | F6P (abcdef)                                                  | <-> | E4P (cdef) + EC2 (ab)                             |
| R14 | S7P (abcdefg)                                                 | <-> | R5P (cdefg) + EC2 (ab)                            |
| R15 | F6P (abcdef)                                                  | <-> | GAP (def) + EC3 (abc)                             |
| R16 | S7P (abcdefg)                                                 | <-> | E4P (defg) + EC3 (abc)                            |
| R17 | PG6 (abcdef)                                                  | ->  | KDPG (abcdef)                                     |
| R18 | KDPG (abcdef)                                                 | ->  | Pyr (abc) + GAP (def)                             |
| R19 | Pyr (abc)                                                     | ->  | AcCoA (bc) + CO2 (a)                              |
| R20 | OAA (abcd) + AcCoA (ef)                                       | ->  | Cit (dcbfea)                                      |
| R21 | Cit (abcdef)                                                  | <-> | ICit (abcdef)                                     |
| R22 | ICit (abcdef)                                                 | <-> | AKG (abcde) + CO2 (f)                             |
| R23 | AKG (abcde)                                                   | ->  | SucCoA (bcde) + CO2 (a)                           |
| R24 | SucCoA (abcd)                                                 | <-> | Suc (abcd)                                        |
| R25 | Suc (abcd)                                                    | <-> | Fum (abcd)                                        |
| R26 | Fum (abcd)                                                    | <-> | Mal (abcd)                                        |
| R27 | Mal (abcd)                                                    | <-> | OAA (abcd)                                        |
| R28 | Mal (abcd)                                                    | ->  | Pyr (abc) + CO2 (d)                               |
| R29 | PEP (abc) + CO2 (d)                                           | <-> | OAA (abcd)                                        |
| R30 | AcCoA (ab)                                                    | <-> | Ac (ab)                                           |
| R31 | DHAP (abc)                                                    | <-> | Glyc3P (abc)                                      |
| R32 | Glyc3P (abc)                                                  | ->  | Glyc (abc)                                        |
| R33 | Glyc (abc)                                                    | ->  | HPA (abc)                                         |
| R34 | HPA (abc)                                                     | ->  | PDO (abc)                                         |
| R35 | AKG (abcde)                                                   | ->  | Glu (abcde)                                       |
| R36 | Glu (abcde)                                                   | ->  | Gln (abcde)                                       |
| R37 | Glu (abcde)                                                   | ->  | Pro (abcde)                                       |
|     | Glu (abcde) + CO2 (f) + Gln (ghijk) + Asp (lmno) + AcCoA (pq) | ->  | Arg (abcdef) + AKG (ghijk) + Fum (lmno) + Ac (pq) |
| R38 |                                                               |     |                                                   |
| R39 | OAA (abcd) + Glu (efghi)                                      | ->  | Asp (abcd) + AKG (efghi)                          |
| R40 | Asp (abcd)                                                    | ->  | Asn (abcd)                                        |

|     |                                                                                                                                                                                                                                                                                             |     |                                                                  |
|-----|---------------------------------------------------------------------------------------------------------------------------------------------------------------------------------------------------------------------------------------------------------------------------------------------|-----|------------------------------------------------------------------|
| R41 | Pyr (abc) + Glu (defgh)                                                                                                                                                                                                                                                                     | ->  | Ala (abc) + AKG (defgh)                                          |
| R42 | PG3 (abc) + Glu (defgh)                                                                                                                                                                                                                                                                     | ->  | Ser (abc) + AKG (defgh)                                          |
| R43 | Ser (abc)                                                                                                                                                                                                                                                                                   | <-> | Gly (ab) + MEETHF (c)                                            |
| R44 | Gly (ab)                                                                                                                                                                                                                                                                                    | <-> | CO2 (a) + MEETHF (b)                                             |
| R45 | Thr (abcd)                                                                                                                                                                                                                                                                                  | ->  | Gly (ab) + AcCoA (cd)                                            |
| R46 | Ser (abc) + AcCoA (de)                                                                                                                                                                                                                                                                      | ->  | Cys (abc) + Ac (de)                                              |
| R47 | Asp (abcd) + Pyr (efg) + Glu (hijkl) + SucCoA (mnop)                                                                                                                                                                                                                                        | ->  | LL_DAP (abcdgfe) + AKG (hijkl) + Suc (mnop)                      |
| R48 | LL_DAP (abcdefg)                                                                                                                                                                                                                                                                            | ->  | Lys (abcdef) + CO2 (g)                                           |
| R49 | Asp (abcd)                                                                                                                                                                                                                                                                                  | ->  | Thr (abcd)                                                       |
| R50 | Asp (abcd) + METHF (e) + Cys (fgh) + SucCoA (ijkl)                                                                                                                                                                                                                                          | ->  | Met (abcde) + Pyr (fgh) + Suc (ijkl)                             |
| R51 | Pyr (abc) + Pyr (def) + Glu (ghijk)                                                                                                                                                                                                                                                         | ->  | Val (abcef) + CO2 (d) + AKG (ghijk)                              |
| R52 | AcCoA (ab) + Pyr (cde) + Pyr (fgh) + Glu (ijklm)                                                                                                                                                                                                                                            | ->  | Leu (abdghe) + CO2 (c) + CO2 (f) + AKG (ijklm)                   |
| R53 | Thr (abcd) + Pyr (efg) + Glu (hijkl)                                                                                                                                                                                                                                                        | ->  | Ile (abfcdg) + CO2 (e) + AKG (hijkl)                             |
| R54 | PEP (abc) + PEP (def) + E4P (ghij) + Glu (klmno)                                                                                                                                                                                                                                            | ->  | Phe (abcefg hij) + CO2 (d) + AKG (klmno)                         |
| R55 | PEP (abc) + PEP (def) + E4P (ghij) + Glu (klmno)                                                                                                                                                                                                                                            | ->  | Tyr (abcefg hij) + CO2 (d) + AKG (klmno)                         |
| R56 | Ser (abc) + R5P (defgh) + PEP (ijk) + E4P (lmno) + PEP (pqr) + Gln (stuvw)                                                                                                                                                                                                                  | ->  | Trp (abcdklmnoj) + CO2 (i) + GAP (fgh) + Pyr (pqr) + Glu (stuvw) |
| R57 | R5P (abcde) + FTHF (f) + Gln (ghijk) + Asp (lmno)                                                                                                                                                                                                                                           | ->  | His (edcbaf) + AKG (ghijk) + Fum (lmno)                          |
| R58 | MEETHF (a)                                                                                                                                                                                                                                                                                  | ->  | METHF (a)                                                        |
| R59 | MEETHF (a)                                                                                                                                                                                                                                                                                  | ->  | FTHF (a)                                                         |
| R60 | Gluc.pre (abcdef)                                                                                                                                                                                                                                                                           | ->  | G6P (abcdef)                                                     |
| R61 | Gluc.ext (abcdef)                                                                                                                                                                                                                                                                           | ->  | G6P (abcdef)                                                     |
| R62 | Cit.ext (abcdef)                                                                                                                                                                                                                                                                            | ->  | Cit (abcdef)                                                     |
| R63 | Glyc.ext (abc) + Dummy.ext                                                                                                                                                                                                                                                                  | <-> | Glyc (abc) + Dummy                                               |
| R64 | PDO (abc)                                                                                                                                                                                                                                                                                   | ->  | PDO.ext (abc)                                                    |
| R65 | Ac (ab)                                                                                                                                                                                                                                                                                     | ->  | Ac.ext (ab)                                                      |
| R66 | CO2 (a)                                                                                                                                                                                                                                                                                     | ->  | CO2.ext (a)                                                      |
| R67 | 0.488*Ala + 0.281*Arg + 0.229*Asn + 0.229*Asp + 0.087*Cys + 0.25*Glu + 0.25*Gln + 0.582*Gly + 0.09*His + 0.276*Ile + 0.428*Leu + 0.326*Lys + 0.146*Met + 0.176*Phe + 0.21*Pro + 0.205*Ser + 0.241*Thr + 0.054*Trp + 0.131*Tyr + 0.402*Val + 0.205*G6P + 0.071*F6P + 0.754*R5P + 0.129*GAP + | ->  | 39.68*Biomass                                                    |

|     |                                                                                                                                                                                         |    |           |
|-----|-----------------------------------------------------------------------------------------------------------------------------------------------------------------------------------------|----|-----------|
| R68 | $0.619 \cdot \text{PG3} + 0.051 \cdot \text{PEP} + 0.083 \cdot \text{Pyr} + 2.51 \cdot \text{AcCoA} + 0.087 \cdot \text{AKG} + 0.34 \cdot \text{OAA} + 0.443 \cdot \text{MEETHF}$ Dummy | -> | Dummy.ext |
|-----|-----------------------------------------------------------------------------------------------------------------------------------------------------------------------------------------|----|-----------|

**Table S2: Metabolic model of *E. coli* (see Table S1) with database identifiers**

| reaction                                | substrates                                                     | arrow | products                                                                |
|-----------------------------------------|----------------------------------------------------------------|-------|-------------------------------------------------------------------------|
| v1 [PGLUCISOM-RXN]                      | G6P [Glucose-6-phosphate]                                      | <->   | F6P [CPD-18719]                                                         |
| v2 [6PFRUCTPHOS-RXN]                    | F6P [CPD-18719]                                                | ->    | FBP [FRUCTOSE-16-DIPHOSPHATE]                                           |
| v3 [F16ALDOLASE-RXN]                    | FBP [FRUCTOSE-16-DIPHOSPHATE]                                  | <->   | DHAP [136411] + GAP [GAP]                                               |
| v4 [TRIOSEPISOMERIZATION-RXN]           | DHAP [136411]                                                  | <->   | GAP [GAP]                                                               |
| v5                                      | GAP (abc) [GAP]                                                | <->   | PG3 (acb)<br>PEP (cba) [PHOSPHO-ENOL-PYRUVATE]                          |
| v6                                      | PG3 (abc)                                                      | <->   |                                                                         |
| v7 [PEPDEPHOS-RXN]                      | PEP [PHOSPHO-ENOL-PYRUVATE]                                    | ->    | Pyr [PYRUVATE]                                                          |
| v8                                      | G6P (abcdef)                                                   | ->    | PG6 (abcdef) [CPD-2961]<br>Ru5P [RIBULOSE-5P] + CO2                     |
| v9 [RXN-9952]                           | PG6 [CPD-2961]                                                 | ->    | [CARBON-DIOXIDE]                                                        |
| v10 [RIBULP3EPIM-RXN]                   | Ru5P [RIBULOSE-5P]                                             | <->   | X5P [XYLULOSE-5-PHOSPHATE]                                              |
| v11 [RIB5PISOM-RXN]                     | Ru5P [RIBULOSE-5P]<br>X5P (abcde) [XYLULOSE-5-PHOSPHATE]       | <->   | R5P [C00117]                                                            |
| v12                                     |                                                                | ↔     | EC2 (ac) + GAP (ebd) [GAP]                                              |
| v13                                     | F6P (abcdef) [CPD-18719]<br>S7P (abcdefg) [D-SEDHEPTULOSE-7-P] | ↔     | EC2 (bf) + E4P (edca)                                                   |
| v14                                     |                                                                | ↔     | EC2 (ab) + R5P (gfedc) [C00117]                                         |
| v15                                     | F6P (abcdef) [CPD-18719]<br>S7P (abcdefg) [D-SEDHEPTULOSE-7-P] | ↔     | EC3 (bfe) + GAP (dac) [GAP]                                             |
| v16                                     |                                                                | ↔     | EC3 (abc) + E4P (defg)<br>KDPG [2-DEHYDRO-3-DEOXY-D-GLUCONATE] (dacebf) |
| v17                                     | PG6 [CPD-2961] (abcdef)                                        | ->    |                                                                         |
| v18 [KDPGALDOL-RXN]                     | KDPG [2-KETO-3-DEOXY-6-P-GLUCONATE]                            | ->    | Pyr [PYRUVATE] + GAP [GAP]                                              |
| v19 [PYRUVDEH-RXN]                      | Pyr [PYRUVATE]<br>OAA [OXALACETIC_ACID]                        | ->    | AcCoA [ACETYL-COA] + CO2<br>[CARBON-DIOXIDE]                            |
| v20 [CITSYN-RXN]                        | + AcCoA [ACETYL-COA]                                           | ->    | Cit [CIT]                                                               |
| v21                                     | Cit [CIT] (abcdef)                                             | <->   | Icit [C00311] (afcbcd)                                                  |
| v22 [ISOCITRATE-DEHYDROGENASE-NAD+-RXN] | Icit [C00311]                                                  | <->   | AKG [2-KETOGLUTARATE] + CO2<br>[CARBON-DIOXIDE]                         |
| v23                                     | AKG [2-KETOGLUTARATE]                                          | ->    | SucCoA [SUC-COA] + CO2<br>[CARBON-DIOXIDE]                              |
| [2OXOGLUTARATED                         |                                                                |       |                                                                         |

|                                |                                                               |     |                                                             |
|--------------------------------|---------------------------------------------------------------|-----|-------------------------------------------------------------|
| EH-RXN]                        |                                                               |     |                                                             |
| v24 [SUCCCOASYN-RXN]           | SucCoA [SUC-COA]                                              | <-> | Suc [SUC]                                                   |
| v25 [SUCC-FUM-<br>OXRED-RXN]   | Suc [SUC]                                                     | <-> | Fum [FUM]                                                   |
| v26 [FUMHYDR-RXN]              | Fum [FUM]                                                     | <-> | Mal [MAL]                                                   |
| v27 [MALATE-DEH-RXN]           | Mal [MAL]                                                     | <-> | OAA [OXALACETIC_ACID]                                       |
| v28 [MALIC-NADP-RXN]           | Mal [MAL]                                                     | ->  | Pyr [PYRUVATE] + CO2 [CARBON-DIOXIDE]                       |
| v29 [PEPCARBOX-RXN]            | PEP [PHOSPHO-ENOL-PYRUVATE] + CO2 [HCO3]                      | <-> | OAA [OXALACETIC_ACID]                                       |
| v30 [ACETYL-COA-HYDROLASE-RXN] | AcCoA [ACETYL-COA]                                            | <-> | Ac [ACET]                                                   |
| v31 [BR22612]                  | DHAP [136411]                                                 | <-> | Glyc3P [C00093]                                             |
| v32 [RXN-14965]                | Glyc3P [GLYCEROL-3P]                                          | ->  | Glyc [GLYCEROL]                                             |
| v33                            | Glyc (abc)                                                    | ->  | HPA (acb)                                                   |
| v34                            | HPA (abc)                                                     | ->  | PDO (abc)                                                   |
|                                | AKG (abcde) [2-KETOGLUTARATE]                                 | ->  | Glu (ecabd)                                                 |
| v35                            |                                                               | ->  | Gln (abcde)                                                 |
| v36                            | Glu (abcde)                                                   | ->  | Pro (abcde)                                                 |
| v37                            | Glu (abcde)                                                   | ->  | Arg (abcdef) + AKG (ijhkg) [2-KETOGLUTARATE] + Fum (mnlo) + |
|                                | Glu (abcde) + CO2 (f) + Gln (ghijk) + Asp (lmno) + AcCoA (pq) | ->  | Ac (pq)                                                     |
| v38                            |                                                               | ->  | Asp (dbac) + AKG (ghfie) [2-KETOGLUTARATE]                  |
| v39                            | OAA (abcd) + Glu (efghi)                                      | ->  | Asn (abcd)                                                  |
| v40                            | Asp (abcd)                                                    | ->  | Ala (cba) + AKG (fgehd) [2-KETOGLUTARATE]                   |
| v41                            | Pyr (abc) + Glu (defgh)                                       | ->  | Ser (abc) + AKG (fgehd) [2-KETOGLUTARATE]                   |
| v42                            | PG3 (abc) + Glu (defgh)                                       | ->  | Gly (ab) + MEETHF (c)                                       |
| v43                            | Ser (abc)                                                     | <-> | CO2 (a) + MEETHF (b)                                        |
| v44                            | Gly (ab)                                                      | <-> | Gly (ab) + AcCoA (dc)                                       |
| v45                            | Thr (abcd)                                                    | ->  | Cys (abc) + Ac (de)                                         |
| v46                            | Ser (abc) + AcCoA (de)                                        | ->  | LL_DAP (abcdefg) + AKG (jkilh) +                            |
|                                | Asp (abcd) + Pyr (efg) + Glu (hijkl) + SucCoA (mnop)          | ->  | Suc (mnop)                                                  |
| v47                            | LL_DAP (abcdefg)                                              | ->  | Lys (abcdef) + CO2 (g)                                      |
| v48                            | Asp (abcd)                                                    | ->  | Thr (abcd)                                                  |
| v49                            | Asp (abcd) + METHF (e) +                                      |     |                                                             |
| v50                            | Cys (fgh) + SucCoA (ijkl)                                     | ->  | Met (abcde) + Pyr (hgf) + Suc (ijkl)                        |
|                                | Pyr (abc) + Pyr (def) + Glu (ghijk)                           | ->  | Val (cbaed) + CO2 (f) + AKG (ijhkg)                         |
| v51                            | AcCoA (ab) + Pyr (cde) + Pyr (fgh) + Glu (ijklm)              | ->  | Leu (badgfc) + CO2 (e) + CO2 (h) +                          |
| v52                            |                                                               | ->  | AKG (kljmi)                                                 |

|     |                                                                                                                                                                                                                                                                                                                                                                                  |     |                                                                   |
|-----|----------------------------------------------------------------------------------------------------------------------------------------------------------------------------------------------------------------------------------------------------------------------------------------------------------------------------------------------------------------------------------|-----|-------------------------------------------------------------------|
| v53 | Thr (abcd) + Pyr (efg) + Glu (hijkl)                                                                                                                                                                                                                                                                                                                                             | ->  | Ile (abfcde) + CO2 (g) + AKG (jkilh)                              |
| v54 | PEP (abc) + PEP (def) + E4P (ghij) + Glu (klmno)                                                                                                                                                                                                                                                                                                                                 | ->  | Phe (cbaedghij) + CO2 (f) + AKG (mnlok)                           |
| v55 | PEP (abc) + PEP (def) + E4P (ghij) + Glu (klmno)                                                                                                                                                                                                                                                                                                                                 | ->  | Tyr (cbaedghij) + CO2 (f) + AKG (mnlok)                           |
| v56 | Ser (abc) + R5P (defgh) + PEP (ijk) + E4P (lmno) + PEP (pqr) + Gln (stuvw)                                                                                                                                                                                                                                                                                                       | ->  | Trp (abcghilmnoj) + CO2 (k) + GAP (fde) + Pyr (pqr) + Glu (stuvw) |
| v57 | R5P (abcde) + FTHF (f) + Gln (ghijk) + Asp (lmno)                                                                                                                                                                                                                                                                                                                                | ->  | His (edcbaf) + AKG (ijhkg) + Fum (mnlo)                           |
| v58 | MEETHF (a)                                                                                                                                                                                                                                                                                                                                                                       | ->  | METHF (a)                                                         |
| v59 | MEETHF (a)                                                                                                                                                                                                                                                                                                                                                                       | ->  | FTHF (a)                                                          |
| v60 | Gluc.pre (abcdef)                                                                                                                                                                                                                                                                                                                                                                | ->  | G6P (fedcba)                                                      |
| v61 | Gluc.ext (abcdef)                                                                                                                                                                                                                                                                                                                                                                | ->  | G6P (fedcba)                                                      |
| v62 | Cit.ext (abcdef)                                                                                                                                                                                                                                                                                                                                                                 | ->  | Cit (abcdef)                                                      |
| v63 | Glyc.ext (abc) + Dummy.ext                                                                                                                                                                                                                                                                                                                                                       | <-> | Glyc (abc) + Dummy                                                |
| v64 | PDO (abc)                                                                                                                                                                                                                                                                                                                                                                        | ->  | PDO.ext (abc)                                                     |
| v65 | Ac (ab)                                                                                                                                                                                                                                                                                                                                                                          | ->  | Ac.ext (ab)                                                       |
| v66 | CO2 (a) [CARBON-DIOXIDE]                                                                                                                                                                                                                                                                                                                                                         | ->  | CO2.ext (a)                                                       |
| v67 | 0.488*Ala + 0.281*Arg + 0.229*Asn + 0.229*Asp + 0.087*Cys + 0.25*Glu + 0.25*Gln + 0.582*Gly + 0.09*His + 0.276*Ile + 0.428*Leu + 0.326*Lys + 0.146*Met + 0.176*Phe + 0.21*Pro + 0.205*Ser + 0.241*Thr + 0.054*Trp + 0.131*Tyr + 0.402*Val + 0.205*G6P + 0.071*F6P + 0.754*R5P + 0.129*GAP + 0.619*PG3 + 0.051*PEP + 0.083*Pyr + 2.51*AcCoA + 0.087*AKG + 0.34*OAA + 0.443*MEETHF | ->  | 39.68*Biomass                                                     |
| v68 | Dummy                                                                                                                                                                                                                                                                                                                                                                            | ->  | Dummy.ext                                                         |



**Table S3: Atom mapping model of *E. coli* (see Table S1) with MetAMDB atom mappings.**

We utilized the *E. coli* atom mapping model in combination with MetAMDB reaction ids to generate MetAMDB atom mappings. Most model reactions are simplified, which means most atom mappings will stay similar to the original ones (with some reordered according to their InChI sorting). Some atom mappings were manually adjusted, which mainly include reduction of Acetyl-CoA and Succinyl-CoA. Simplified atom mappings only specify two and four carbon atoms respectively, while database atom mappings include all carbon atom in the mapping.

| ID  | Substrates              |     | Products                |
|-----|-------------------------|-----|-------------------------|
| R1  | G6P (abcdef)            | <-> | F6P (afbcde)            |
| R2  | F6P (abcdef)            | ->  | FBP (abcdef)            |
| R3  | FBP (abcdef)            | <-> | DHAP (ebf) + GAP (dac)  |
| R4  | DHAP (abc)              | <-> | GAP (abc)               |
| R5  | GAP (abc)               | <-> | PG3 (acb)               |
| R6  | PG3 (abc)               | <-> | PEP (cba)               |
| R7  | PEP (abc)               | ->  | Pyr (abc)               |
| R8  | G6P (abcdef)            | ->  | PG6 (abcdef)            |
| R9  | PG6 (abcdef)            | ->  | Ru5P (eadbc) + CO2 (f)  |
| R10 | Ru5P (abcde)            | <-> | X5P (abcde)             |
| R11 | Ru5P (abcde)            | <-> | R5P (bdeca)             |
| R12 | X5P (abcde)             | <-> | EC2 (ac) + GAP (ebd)    |
| R13 | F6P (abcdef)            | <-> | EC2 (bf) + E4P (edca)   |
| R14 | S7P (abcdefg)           | <-> | EC2 (ab) + R5P (gfedc)  |
| R15 | F6P (abcdef)            | <-> | EC3 (bfe) + GAP (dac)   |
| R16 | S7P (abcdefg)           | <-> | EC3 (abc) + E4P (defg)  |
| R17 | PG6 (abcdef)            | ->  | KDPG (dacebf)           |
| R18 | KDPG (abcdef)           | ->  | Pyr (adf) + GAP (cbe)   |
| R19 | Pyr (abc)               | ->  | AcCoA (ab) + CO2 (c)    |
| R20 | OAA (abcd) + AcCoA (tu) | ->  | Cit (eafcdb)            |
| R21 | Cit (abcdef)            | <-> | Icit (afcbed)           |
| R22 | ICit (abcdef)           | <-> | AKG (badcf) + CO2 (e)   |
| R23 | AKG (abcde)             | ->  | SucCoA (badc) + CO2 (e) |
| R24 | SucCoA (fghi)           | <-> | Suc (abcd)              |
| R25 | Suc (abcd)              | <-> | Fum (abcd)              |
| R26 | Fum (abcd)              | <-> | Mal (abcd)              |
| R27 | Mal (abcd)              | <-> | OAA (abcd)              |
| R28 | Mal (abcd)              | ->  | Pyr (abd) + CO2 (c)     |
| R29 | PEP (abc) + CO2 (d)     | <-> | OAA (abdc)              |
| R30 | AcCoA (ab)              | <-> | Ac (ab)                 |
| R31 | DHAP (abc)              | <-> | Glyc3P (abc)            |
| R32 | Glyc3P (abc)            | ->  | Glyc (abc)              |
| R33 | Glyc (abc)              | ->  | HPA (acb)               |
| R34 | HPA (abc)               | ->  | PDO (abc)               |
| R35 | AKG (abcde)             | ->  | Glu (ecabd)             |
| R36 | Glu (abcde)             | ->  | Gln (abcde)             |

|     |                                                                            |     |                                                                    |
|-----|----------------------------------------------------------------------------|-----|--------------------------------------------------------------------|
| R37 | Glu (abcde)                                                                | ->  | Pro (abcde)                                                        |
|     | Glu (abcde) + CO2 (f) + Gln (ghijk) + Asp (lmno) + AcCoA (pq)              | ->  | Arg (abcdef) + AKG (ijhkg) + Fum (mnlo) + Ac (pq)                  |
| R38 |                                                                            |     |                                                                    |
| R39 | OAA (abcd) + Glu (efghi)                                                   | ->  | Asp (dbac) + AKG (ghfie)                                           |
| R40 | Asp (abcd)                                                                 | ->  | Asn (abcd)                                                         |
| R41 | Pyr (abc) + Glu (defgh)                                                    | ->  | Ala (cba) + AKG (fgehd)                                            |
| R42 | PG3 (abc) + Glu (defgh)                                                    | ->  | Ser (abc) + AKG (fgehd)                                            |
| R43 | Ser (abc)                                                                  | <-> | Gly (ab) + MEETHF (c)                                              |
| R44 | Gly (ab)                                                                   | <-> | CO2 (a) + MEETHF (b)                                               |
| R45 | Thr (abcd)                                                                 | ->  | Gly (ab) + AcCoA (dc)                                              |
| R46 | Ser (abc) + AcCoA (de)                                                     | ->  | Cys (abc) + Ac (de)                                                |
|     | Asp (abcd) + Pyr (efg) + Glu (hijkl) + SucCoA (mnop)                       | ->  | LL_DAP (abcdefg) + AKG (jkilh) + Suc (mnop)                        |
| R47 |                                                                            |     |                                                                    |
| R48 | LL_DAP (abcdefg)                                                           | ->  | Lys (abcdef) + CO2 (g)                                             |
| R49 | Asp (abcd)                                                                 | ->  | Thr (abcd)                                                         |
|     | Asp (abcd) + METHF (e) + Cys (fgh) + SucCoA (ijkl)                         | ->  | Met (abcde) + Pyr (hgf) + Suc (ijkl)                               |
| R50 |                                                                            |     |                                                                    |
| R51 | Pyr (abc) + Pyr (def) + Glu (ghijk)                                        | ->  | Val (cbaed) + CO2 (f) + AKG (ijhkg)                                |
|     | AcCoA (ab) + Pyr (cde) + Pyr (fgh) + Glu (ijklm)                           | ->  | Leu (badgfc) + CO2 (e) + CO2 (h) + AKG (kljmi)                     |
| R52 |                                                                            |     |                                                                    |
| R53 | Thr (abcd) + Pyr (efg) + Glu (hijkl)                                       | ->  | Ile (abfcde) + CO2 (g) + AKG (jkilh)                               |
|     | PEP (abc) + PEP (def) + E4P (ghij)                                         | ->  | Phe (cbaedghij) + CO2 (f) + AKG (mnlok)                            |
| R54 | + Glu (klmno)                                                              | ->  |                                                                    |
|     | PEP (abc) + PEP (def) + E4P (ghij)                                         | ->  | Tyr (cbaedghij) + CO2 (f) + AKG (mnlok)                            |
| R55 | + Glu (klmno)                                                              | ->  |                                                                    |
|     | Ser (abc) + R5P (defgh) + PEP (ijk) + E4P (lmno) + PEP (pqr) + Gln (stuvw) | ->  | Trp (abceghilmnoj) + CO2 (k) + GAP (fde) + Pyr (pqr) + Glu (stuvw) |
| R56 |                                                                            |     |                                                                    |
|     | R5P (abcde) + FTHF (f) + Gln (ghijk) + Asp (lmno)                          | ->  | His (edcbaf) + AKG (ijhkg) + Fum (mnlo)                            |
| R57 |                                                                            |     |                                                                    |
| R58 | MEETHF (a)                                                                 | ->  | METHF (a)                                                          |
| R59 | MEETHF (a)                                                                 | ->  | FTHF (a)                                                           |
| R60 | Gluc.pre (abcdef)                                                          | ->  | G6P (fedcba)                                                       |
| R61 | Gluc.ext (abcdef)                                                          | ->  | G6P (fedcba)                                                       |
| R62 | Cit.ext (abcdef)                                                           | ->  | Cit (abcdef)                                                       |
| R63 | Glyc.ext (abc) + Dummy.ext                                                 | <-> | Glyc (abc)                                                         |
| R64 | PDO (abc)                                                                  | ->  | PDO.ext (abc)                                                      |
| R65 | Ac (ab)                                                                    | ->  | Ac.ext (ab)                                                        |
| R66 | CO2 (a)                                                                    | ->  | CO2.ext (a)                                                        |

|     |                                  |    |               |
|-----|----------------------------------|----|---------------|
|     | 0.488*Ala + 0.281*Arg +          |    |               |
|     | 0.229*Asn + 0.229*Asp +          |    |               |
|     | 0.087*Cys + 0.25*Glu + 0.25*Gln  |    |               |
|     | + 0.582*Gly + 0.09*His +         |    |               |
|     | 0.276*Ile + 0.428*Leu +          |    |               |
|     | 0.326*Lys + 0.146*Met +          |    |               |
|     | 0.176*Phe + 0.21*Pro + 0.205*Ser |    |               |
|     | + 0.241*Thr + 0.054*Trp +        |    |               |
|     | 0.131*Tyr + 0.402*Val +          |    |               |
|     | 0.205*G6P + 0.071*F6P +          |    |               |
|     | 0.754*R5P + 0.129*GAP +          |    |               |
|     | 0.619*PG3 + 0.051*PEP +          |    |               |
|     | 0.083*Pyr + 2.51*AcCoA +         |    |               |
|     | 0.087*AKG + 0.34*OAA +           |    |               |
| R67 | 0.443*MEETHF                     | -> | 39.68*Biomass |
| R68 | Dummy                            | -> | Dummy.ext     |

Table S4: Flux estimation results for the *E. coli* model (see Table S1 (correct) and S7 (incorrect)).

|                   |     |      |         | Cor.   | Model  |         | Incor.  | Model   |
|-------------------|-----|------|---------|--------|--------|---------|---------|---------|
| Reaction          |     |      | Flux    | 95%    | Conf.  | Flux    | 95%     | Conf.   |
| G6P ↔ F6P         | R1  | net  | 63.91   | 52.42  | 72.28  | 77.10   | NaN     | 86.21   |
|                   |     | exch | 0.00    | 0.00   | 99.54  | 291.10  | 242.16  | 338.20  |
| F6P → FBP         | R2  | net  | 86.24   | 79.23  | 92.91  | 76.40   | NaN     | 86.12   |
| FBP ↔ DHAP + GAP  | R3  | net  | 86.24   | 79.23  | 92.91  | 76.40   | NaN     | 86.12   |
|                   |     | exch | 595.57  | 0.00   | Inf    | 271.00  | 0.00    | 4.20E+6 |
| DHAP ↔ GAP        | R4  | net  | -41.07  | -48.47 | -33.94 | -42.00  | -52.04  | -31.60  |
|                   |     | exch | 246.39  | 189.76 | 349.02 | 31.90   | 28.17   | 35.88   |
| GAP ↔ PG3         | R5  | net  | 56.28   | 49.92  | 64.40  | 57.70   | 52.00   | 64.56   |
|                   |     | exch | 8.03E+5 | 165.61 | Inf    | 4.14E+5 | 0.00    | Inf     |
| PG3 ↔ PEP         | R6  | net  | 54.72   | 49.11  | 60.24  | 56.40   | 50.56   | 63.19   |
|                   |     | exch | 5571.90 | 153.76 | Inf    | 5.23E+5 | 0.00    | Inf     |
| PEP → Pyr         | R7  |      | 48.58   | 43.22  | 56.55  | 53.50   | 48.05   | 60.20   |
| G6P → PG6         | R8  |      | 34.69   | 28.87  | 45.02  | 23.70   | 21.09   | 26.52   |
| PG6 → Ru5P + CO2  | R9  |      | 34.55   | 28.65  | 45.54  | 0.00    | 0.00    | 1.52    |
| Ru5P ↔ X5P        | R10 | net  | 22.39   | 18.45  | 30.70  | -0.60   | -0.64   | 0.55    |
|                   |     | exch | 108.87  | 0.00   | Inf    | 4.73E+6 | 9.35E+4 | NaN     |
| Ru5P ↔ R5P        | R11 | net  | 12.16   | 10.25  | 16.50  | 0.60    | 0.00    | 1.04    |
|                   |     | exch | 0.00    | 0.00   | Inf    | 4.73E+6 | 6.04E+4 | NaN     |
| X5P ↔ EC2 + GAP   | R12 | net  | 22.39   | 18.45  | 30.70  | -0.60   | -0.64   | 0.55    |
|                   |     | exch | 3125.70 | 47.20  | Inf    | 4.73E+6 | 6.17E+4 | NaN     |
| F6P ↔ EC2 + E4P   | R13 | net  | -11.03  | -15.19 | -9.12  | 0.40    | -0.21   | 0.48    |
|                   |     | exch | 5.80    | 0.00   | 13.28  | 61.30   | 49.75   | 76.10   |
| S7P ↔ EC2 + R5P   | R14 | net  | -11.36  | -15.72 | -9.35  | 0.10    | -0.35   | 0.16    |
|                   |     | exch | 127.32  | 0.00   | Inf    | 2.95E+6 | 1.75E+4 | Inf     |
| F6P ↔ EC3 + GAP   | R15 | net  | -11.36  | -15.72 | -9.35  | 0.10    | -0.35   | 0.16    |
|                   |     | exch | 0.00    | 0.00   | Inf    | 2.21E+6 | 7316.10 | Inf     |
| S7P ↔ EC3 + E4P   | R16 | net  | 11.36   | 9.35   | 15.72  | -0.10   | -0.16   | 0.35    |
|                   |     | exch | 0.00    | 0.00   | Inf    | 2.95E+6 | 1.71E+4 | 2.95E+6 |
| PG6 → KDPG        | R17 |      | 0.14    | 0.00   | 0.88   | 23.70   | NaN     | 26.71   |
| KDPG → Pyr + GAP  | R18 |      | 0.14    | 0.00   | 0.88   | 23.70   | NaN     | 26.71   |
| Pyr → AcCoA + CO2 | R19 |      | 49.52   | 44.22  | 57.68  | 75.20   | NaN     | 84.43   |

|                                                      |     |      |         |        |         |         |        |         |
|------------------------------------------------------|-----|------|---------|--------|---------|---------|--------|---------|
| OAA + AcCoA → Cit                                    | R20 |      | 46.58   | 41.12  | 51.84   | 72.70   | 65.44  | 81.61   |
| Cit ↔ Icit                                           | R21 | net  | 46.85   | 41.45  | 54.49   | 72.90   | 65.32  | NaN     |
|                                                      |     | exch | 94.63   | 45.78  | 238.21  | 1.29E+4 | 172.23 | NaN     |
| Icit ↔ AKG + CO2                                     | R22 | net  | 46.85   | 41.45  | 54.49   | 72.90   | 65.32  | NaN     |
|                                                      |     | exch | 1.85E+4 | 47.91  | Inf     | 9137.60 | 184.37 | Inf     |
| AKG → SucCoA + CO2                                   | R23 |      | 45.89   | 40.52  | 53.87   | 72.10   | 65.35  | 81.24   |
| SucCoA ↔ Suc                                         | R24 | net  | 45.46   | 40.02  | 53.42   | 71.70   | 64.77  | 80.53   |
|                                                      |     | exch | 451.66  | 0.00   | Inf     | 85.70   | 0.00   | Inf     |
| Suc ↔ Fum                                            | R25 | net  | 45.89   | 40.52  | 53.87   | 72.10   | 65.35  | 81.24   |
|                                                      |     | exch | 146.97  | 53.13  | 7453.40 | 4.34E+5 | 6.83   | 4.34E+5 |
| Fum ↔ Mal                                            | R26 | net  | 46.22   | 40.80  | 54.14   | 72.30   | 64.64  | 81.63   |
|                                                      |     | exch | 5.07E+5 | 196.33 | Inf     | 8.67E+5 | 610.91 | Inf     |
| Mal ↔ OAA                                            | R27 | net  | 43.07   | 37.66  | 48.28   | 72.30   | 64.68  | 81.57   |
|                                                      |     | exch | 198.16  | 134.64 | 2.81E+4 | 9.31E+5 | 477.61 | Inf     |
| Mal → Pyr + CO2                                      | R28 |      | 3.15    | 1.85   | 4.02    | 0.00    | 0.00   | 0.33    |
| PEP + CO2 ↔ OAA                                      | R29 | net  | 5.44    | 4.06   | 6.43    | 2.20    | 1.72   | 2.57    |
|                                                      |     | exch | 7.14    | 5.31   | 9.06    | 0.00    | 0.00   | 0.75    |
| AcCoA ↔ Ac                                           | R30 | net  | -0.15   | -0.21  | -0.05   | -0.10   | -0.16  | 0.01    |
|                                                      |     | exch | 0.00    | 0.00   | Inf     | 3.65E+5 | 0.00   | 3.65E+5 |
| DHAP ↔ Glyc3P                                        | R31 | net  | 127.32  | 114.03 | 140.16  | 118.50  | 100.25 | 137.60  |
|                                                      |     | exch | 3.00E+5 | 0.00   | Inf     | 4.30    | 0.00   | Inf     |
| Glyc3P → Glyc                                        | R32 |      | 127.32  | 114.03 | 140.16  | 118.50  | 100.25 | 137.60  |
| Glyc → HPA                                           | R33 |      | 129.30  | 116.61 | 141.99  | 120.50  | NaN    | 139.48  |
| HPA → PDO                                            | R34 |      | 129.30  | 116.61 | 141.99  | 120.50  | NaN    | 139.48  |
| AKG → Glu                                            | R35 |      | 5.84    | 4.95   | 6.49    | 5.20    | NaN    | 5.96    |
| Glu → Gln                                            | R36 |      | 0.60    | 0.51   | 0.67    | 0.50    | 0.43   | 0.60    |
| Glu → Pro                                            | R37 |      | 0.19    | 0.16   | 0.21    | 0.20    | 0.13   | 0.19    |
| Glu + CO2 + Gln + Asp + AcCoA → Arg + AKG + Fum + Ac | R38 |      | 0.25    | 0.21   | 0.28    | 0.20    | 0.18   | 0.25    |
| OAA + Glu → Asp + AKG                                | R39 |      | 1.63    | 1.38   | 1.81    | 1.60    | NaN    | 1.76    |
| Asp → Asn                                            | R40 |      | 0.20    | 0.17   | 0.23    | 0.20    | 0.14   | 0.20    |
| Pyr + Glu → Ala + AKG                                | R41 |      | 0.44    | 0.37   | 0.48    | 0.40    | 0.31   | 0.44    |
| PG3 + Glu → Ser + AKG                                | R42 |      | 1.00    | 0.84   | 1.12    | 0.80    | 0.63   | 0.94    |
| Ser ↔ Gly + MEETHF                                   | R43 | net  | 0.56    | 0.47   | 0.63    | 0.40    | NaN    | 0.49    |
|                                                      |     | exch | 0.84    | 0.73   | 0.97    | 1.70    | 1.29   | 1.97    |

|                                                                                               |     |             |        |        |        |         |        |        |
|-----------------------------------------------------------------------------------------------|-----|-------------|--------|--------|--------|---------|--------|--------|
| Gly $\leftrightarrow$ CO <sub>2</sub> + MEETHF                                                | R44 | net<br>exch | 0.04   | 0.04   | 0.07   | 0.10    | 0.07   | 0.15   |
|                                                                                               |     |             | 0.17   | 0.13   | 0.20   | 0.00    | 0.00   | 0.07   |
| Thr $\rightarrow$ Gly + AcCoA                                                                 | R45 |             | 0.00   | 0.00   | 0.06   | 0.20    | NaN    | 0.21   |
| Ser + AcCoA $\rightarrow$ Cys + Ac                                                            | R46 |             | 0.21   | 0.18   | 0.23   | 0.20    | 0.15   | 0.21   |
| Asp + Pyr + Glu + SucCoA<br>$\rightarrow$ LL_DAP + AKG + Suc                                  | R47 |             | 0.29   | 0.25   | 0.32   | 0.30    | 0.21   | 0.29   |
| LL_DAP $\rightarrow$ Lys + CO <sub>2</sub>                                                    | R48 |             | 0.29   | 0.25   | 0.32   | 0.30    | 0.21   | 0.29   |
| Asp $\rightarrow$ Thr                                                                         | R49 |             | 0.46   | 0.39   | 0.54   | 0.60    | 0.42   | 0.66   |
| Asp + METHF + Cys +<br>SucCoA $\rightarrow$ Met + Pyr + Suc                                   | R50 |             | 0.13   | 0.11   | 0.14   | 0.10    | 0.09   | 0.13   |
| Pyr + Pyr + Glu $\rightarrow$ Val +<br>CO <sub>2</sub> + AKG                                  | R51 |             | 0.36   | 0.30   | 0.40   | 0.30    | 0.25   | 0.36   |
| AcCoA + Pyr + Pyr + Glu $\rightarrow$<br>Leu + CO <sub>2</sub> + CO <sub>2</sub> + AKG        | R52 |             | 0.38   | 0.32   | 0.42   | 0.30    | 0.27   | 0.38   |
| Thr + Pyr + Glu $\rightarrow$ Ile + CO <sub>2</sub><br>+ AKG                                  | R53 |             | 0.25   | 0.21   | 0.27   | 0.20    | 0.17   | 0.25   |
| PEP + PEP + E4P + Glu $\rightarrow$<br>Phe + CO <sub>2</sub> + AKG                            | R54 |             | 0.16   | 0.13   | 0.17   | 0.10    | 0.11   | 0.16   |
| PEP + PEP + E4P + Glu $\rightarrow$<br>Tyr + CO <sub>2</sub> + AKG                            | R55 |             | 0.12   | 0.10   | 0.13   | 0.10    | 0.08   | 0.12   |
| Ser + R5P + PEP + E4P +<br>PEP + Gln $\rightarrow$ Trp + CO <sub>2</sub> +<br>GAP + Pyr + Glu | R56 |             | 0.05   | 0.04   | 0.05   | 0.00    | 0.03   | 0.05   |
| R5P + FTHF + Gln + Asp $\rightarrow$<br>His + AKG + Fum                                       | R57 |             | 0.08   | 0.07   | 0.09   | 0.10    | 0.06   | 0.08   |
| MEETHF $\rightarrow$ METHF                                                                    | R58 |             | 0.13   | 0.11   | 0.14   | 0.10    | 0.09   | 0.13   |
| MEETHF $\rightarrow$ FTHF                                                                     | R59 |             | 0.08   | 0.07   | 0.09   | 0.10    | 0.06   | 0.08   |
| Gluc.pre $\rightarrow$ G6P                                                                    | R60 |             | 6.44   | 5.39   | 7.37   | 0.00    | 0.00   | 0.04   |
| Gluc.ext $\rightarrow$ G6P                                                                    | R61 |             | 92.35  | 86.05  | 98.54  | 101.00  | 91.30  | 110.98 |
| Cit.ext $\rightarrow$ Cit                                                                     | R62 |             | 0.27   | 0.24   | 0.30   | 0.20    | NaN    | 0.23   |
| Glyc.ext $\leftrightarrow$ Glyc                                                               | R63 | net<br>exch | 1.98   | 1.76   | 2.20   | 1.99    | 1.65   | 2.27   |
|                                                                                               |     |             | 45.83  | 0.00   | Inf    | 1500.00 | 0.00   | Inf    |
| PDO $\rightarrow$ PDO.ext                                                                     | R64 |             | 129.30 | 116.61 | 141.99 | 120.50  | NaN    | 139.48 |
| Ac $\rightarrow$ Ac.ext                                                                       | R65 |             | 0.31   | 0.28   | 0.35   | 0.30    | 0.26   | 0.36   |
| CO <sub>2</sub> $\rightarrow$ CO <sub>2</sub> .ext                                            | R66 |             | 176.29 | 158.33 | 205.05 | 219.60  | 197.85 | NaN    |
| Biomass formation                                                                             | R67 |             | 0.89   | 0.76   | 0.99   | 0.80    | 0.63   | 0.89   |
| Dummy $\rightarrow$ Dummy.ext                                                                 | R68 |             | 1.98   | 1.76   | 2.22   | 2.00    | 1.65   | 2.27   |

**Table S5: Mass Isotopomer Distribution (MID) results for the *E. coli* model without errors (see Table S1).**

| Mass Isotopomer | M0     | M1     | M2     | M3     | M4     | M5     | M6     | M7     | M8     | M9     |
|-----------------|--------|--------|--------|--------|--------|--------|--------|--------|--------|--------|
| AKG5            | 0.1781 | 0.2673 | 0.2766 | 0.1839 | 0.0728 | 0.0213 |        |        |        |        |
| AcCoA           | 0.5497 | 0.2209 | 0.2294 |        |        |        |        |        |        |        |
| Ala2            | 0.5617 | 0.2153 | 0.223  |        |        |        |        |        |        |        |
| Ala3            | 0.5295 | 0.2285 | 0.0452 | 0.1967 |        |        |        |        |        |        |
| Asp2a           | 0.4995 | 0.2993 | 0.2012 |        |        |        |        |        |        |        |
| Asp2b           | 0.4995 | 0.2993 | 0.2012 |        |        |        |        |        |        |        |
| Asp3            | 0.3156 | 0.3617 | 0.2292 | 0.0935 |        |        |        |        |        |        |
| Asp4            | 0.2447 | 0.3257 | 0.2443 | 0.1349 | 0.0504 |        |        |        |        |        |
| Cit6            | 0.1157 | 0.2308 | 0.2688 | 0.2156 | 0.117  | 0.0424 | 0.0097 |        |        |        |
| E4P             | 0.5423 | 0.1861 | 0.0469 | 0.0956 | 0.1291 |        |        |        |        |        |
| Glu4            | 0.2276 | 0.3181 | 0.2802 | 0.1341 | 0.0401 |        |        |        |        |        |
| Glu5            | 0.1794 | 0.267  | 0.2762 | 0.1834 | 0.0726 | 0.0213 |        |        |        |        |
| Gly1            | 0.726  | 0.274  |        |        |        |        |        |        |        |        |
| Gly2            | 0.6531 | 0.1417 | 0.2052 |        |        |        |        |        |        |        |
| Ile5a           | 0.1737 | 0.2686 | 0.2782 | 0.1849 | 0.0732 | 0.0214 |        |        |        |        |
| Ile5b           | 0.1737 | 0.2686 | 0.2782 | 0.1849 | 0.0732 | 0.0214 |        |        |        |        |
| Leu5            | 0.1787 | 0.2669 | 0.2749 | 0.1847 | 0.0728 | 0.0221 |        |        |        |        |
| Mal4            | 0.2412 | 0.3244 | 0.2511 | 0.1349 | 0.0485 |        |        |        |        |        |
| Met4a           | 0.1916 | 0.3436 | 0.2812 | 0.1468 | 0.0368 |        |        |        |        |        |
| Met4b           | 0.1916 | 0.3436 | 0.2812 | 0.1468 | 0.0368 |        |        |        |        |        |
| Met5            | 0.1486 | 0.2939 | 0.2763 | 0.1779 | 0.0836 | 0.0198 |        |        |        |        |
| Phe2            | 0.7178 | 0.068  | 0.2142 |        |        |        |        |        |        |        |
| Phe8a           | 0.1696 | 0.1841 | 0.2227 | 0.1498 | 0.1243 | 0.0737 | 0.051  | 0.0177 | 0.007  |        |
| Phe8b           | 0.1696 | 0.1841 | 0.2227 | 0.1498 | 0.1243 | 0.0737 | 0.051  | 0.0177 | 0.007  |        |
| Phe9            | 0.1612 | 0.1832 | 0.1608 | 0.1706 | 0.1307 | 0.093  | 0.0529 | 0.03   | 0.0113 | 0.0063 |
| Pyr3            | 0.5169 | 0.2342 | 0.0467 | 0.2023 |        |        |        |        |        |        |
| Ser2a           | 0.5055 | 0.3183 | 0.1762 |        |        |        |        |        |        |        |
| Ser2b           | 0.6885 | 0.1014 | 0.2101 |        |        |        |        |        |        |        |
| Ser2c           | 0.5055 | 0.3183 | 0.1762 |        |        |        |        |        |        |        |
| Suc4            | 0.2376 | 0.323  | 0.2581 | 0.1348 | 0.0465 |        |        |        |        |        |
| Thr3            | 0.3157 | 0.3616 | 0.2291 | 0.0935 |        |        |        |        |        |        |
| Thr4            | 0.2448 | 0.3257 | 0.2442 | 0.1349 | 0.0504 |        |        |        |        |        |
| Tyr2            | 0.7179 | 0.068  | 0.2141 |        |        |        |        |        |        |        |
| Val4            | 0.3024 | 0.2428 | 0.3009 | 0.1013 | 0.0526 |        |        |        |        |        |
| Val5            | 0.2844 | 0.2429 | 0.1959 | 0.1752 | 0.0554 | 0.0464 |        |        |        |        |

**Table S6: Mass Isotopomer Distribution (MID) results for the *E. coli* model with MetAMDB atom mappings (see Table S3).**

| Mass Isotopomer | M0     | M1     | M2     | M3     | M4     | M5     | M6     | M7     | M8     | M9     |
|-----------------|--------|--------|--------|--------|--------|--------|--------|--------|--------|--------|
| AKG5            | 0.1781 | 0.2673 | 0.2766 | 0.1839 | 0.0728 | 0.0213 |        |        |        |        |
| AcCoA           | 0.5497 | 0.2209 | 0.2294 |        |        |        |        |        |        |        |
| Ala2            | 0.5617 | 0.2153 | 0.223  |        |        |        |        |        |        |        |
| Ala3            | 0.5295 | 0.2285 | 0.0452 | 0.1967 |        |        |        |        |        |        |
| Asp2a           | 0.4995 | 0.2993 | 0.2012 |        |        |        |        |        |        |        |
| Asp2b           | 0.4995 | 0.2993 | 0.2012 |        |        |        |        |        |        |        |
| Asp3            | 0.3156 | 0.3617 | 0.2292 | 0.0935 |        |        |        |        |        |        |
| Asp4            | 0.2447 | 0.3257 | 0.2443 | 0.1349 | 0.0504 |        |        |        |        |        |
| Cit6            | 0.1157 | 0.2308 | 0.2688 | 0.2156 | 0.117  | 0.0424 | 0.0097 |        |        |        |
| E4P             | 0.5423 | 0.1861 | 0.0469 | 0.0956 | 0.1291 |        |        |        |        |        |
| Glu4            | 0.2276 | 0.3181 | 0.2802 | 0.1341 | 0.0401 |        |        |        |        |        |
| Glu5            | 0.1794 | 0.267  | 0.2762 | 0.1834 | 0.0726 | 0.0213 |        |        |        |        |
| Gly1            | 0.726  | 0.274  |        |        |        |        |        |        |        |        |
| Gly2            | 0.6531 | 0.1417 | 0.2052 |        |        |        |        |        |        |        |
| Ile5a           | 0.1737 | 0.2686 | 0.2782 | 0.1849 | 0.0732 | 0.0214 |        |        |        |        |
| Ile5b           | 0.1737 | 0.2686 | 0.2782 | 0.1849 | 0.0732 | 0.0214 |        |        |        |        |
| Leu5            | 0.1787 | 0.2669 | 0.2749 | 0.1847 | 0.0728 | 0.0221 |        |        |        |        |
| Mal4            | 0.2412 | 0.3244 | 0.2511 | 0.1349 | 0.0485 |        |        |        |        |        |
| Met4a           | 0.1916 | 0.3436 | 0.2812 | 0.1468 | 0.0368 |        |        |        |        |        |
| Met4b           | 0.1916 | 0.3436 | 0.2812 | 0.1468 | 0.0368 |        |        |        |        |        |
| Met5            | 0.1486 | 0.2939 | 0.2763 | 0.1779 | 0.0836 | 0.0198 |        |        |        |        |
| Phe2            | 0.7178 | 0.068  | 0.2142 |        |        |        |        |        |        |        |
| Phe8a           | 0.1696 | 0.1841 | 0.2227 | 0.1498 | 0.1243 | 0.0737 | 0.051  | 0.0177 | 0.007  |        |
| Phe8b           | 0.1696 | 0.1841 | 0.2227 | 0.1498 | 0.1243 | 0.0737 | 0.051  | 0.0177 | 0.007  |        |
| Phe9            | 0.1612 | 0.1832 | 0.1608 | 0.1706 | 0.1307 | 0.093  | 0.0529 | 0.03   | 0.0113 | 0.0063 |
| Pyr3            | 0.5169 | 0.2342 | 0.0467 | 0.2023 |        |        |        |        |        |        |
| Ser2a           | 0.5055 | 0.3183 | 0.1762 |        |        |        |        |        |        |        |
| Ser2b           | 0.6885 | 0.1014 | 0.2101 |        |        |        |        |        |        |        |
| Ser2c           | 0.5055 | 0.3183 | 0.1762 |        |        |        |        |        |        |        |
| Suc4            | 0.2376 | 0.323  | 0.2581 | 0.1348 | 0.0465 |        |        |        |        |        |
| Thr3            | 0.3157 | 0.3616 | 0.2291 | 0.0935 |        |        |        |        |        |        |
| Thr4            | 0.2448 | 0.3257 | 0.2442 | 0.1349 | 0.0504 |        |        |        |        |        |
| Tyr2            | 0.7179 | 0.068  | 0.2141 |        |        |        |        |        |        |        |
| Val4            | 0.3024 | 0.2428 | 0.3009 | 0.1013 | 0.0526 |        |        |        |        |        |
| Val5            | 0.2844 | 0.2429 | 0.1959 | 0.1752 | 0.0554 | 0.0464 |        |        |        |        |



*Table S7: Atom mapping model of the INCA E. coli model (Young, 2014) with an error in R3.*

In this model we introduced an error in the aldolase reaction with the ID R3. Both dihydroxyacetone phosphate's (DHAP) and glyceraldehyde 3-phosphate's (GAP) mappings are mirrored, meaning the first and third carbon atoms are swapped in each metabolite.

| ID        | Substrates                                               |     | Products                                          |
|-----------|----------------------------------------------------------|-----|---------------------------------------------------|
| R1        | G6P (abcdef)                                             | <-> | F6P (abcdef)                                      |
| R2        | F6P (abcdef)                                             | ->  | FBP (abcdef)                                      |
| <b>R3</b> | <b>FBP (abcdef)</b>                                      | <-> | <b>DHAP (abc) + GAP (fed)</b>                     |
| R4        | DHAP (abc)                                               | <-> | GAP (abc)                                         |
| R5        | GAP (abc)                                                | <-> | PG3 (abc)                                         |
| R6        | PG3 (abc)                                                | <-> | PEP (abc)                                         |
| R7        | PEP (abc)                                                | ->  | Pyr (abc)                                         |
| R8        | G6P (abcdef)                                             | ->  | PG6 (abcdef)                                      |
| R9        | PG6 (abcdef)                                             | ->  | Ru5P (bcdef) + CO2 (a)                            |
| R10       | Ru5P (abcde)                                             | <-> | X5P (abcde)                                       |
| R11       | Ru5P (abcde)                                             | <-> | R5P (abcde)                                       |
| R12       | X5P (abcde)                                              | <-> | GAP (cde) + EC2 (ab)                              |
| R13       | F6P (abcdef)                                             | <-> | E4P (cdef) + EC2 (ab)                             |
| R14       | S7P (abcdefg)                                            | <-> | R5P (cdefg) + EC2 (ab)                            |
| R15       | F6P (abcdef)                                             | <-> | GAP (def) + EC3 (abc)                             |
| R16       | S7P (abcdefg)                                            | <-> | E4P (defg) + EC3 (abc)                            |
| R17       | PG6 (abcdef)                                             | ->  | KDPG (abcdef)                                     |
| R18       | KDPG (abcdef)                                            | ->  | Pyr (abc) + GAP (def)                             |
| R19       | Pyr (abc)                                                | ->  | AcCoA (bc) + CO2 (a)                              |
| R20       | OAA (abcd) + AcCoA (ef)                                  | ->  | Cit (dcbfea)                                      |
| R21       | Cit (abcdef)                                             | <-> | ICit (abcdef)                                     |
| R22       | ICit (abcdef)                                            | <-> | AKG (abcde) + CO2 (f)                             |
| R23       | AKG (abcde)                                              | ->  | SucCoA (bcde) + CO2 (a)                           |
| R24       | SucCoA (abcd)                                            | <-> | Suc (abcd)                                        |
| R25       | Suc (abcd)                                               | <-> | Fum (abcd)                                        |
| R26       | Fum (abcd)                                               | <-> | Mal (abcd)                                        |
| R27       | Mal (abcd)                                               | <-> | OAA (abcd)                                        |
| R28       | Mal (abcd)                                               | ->  | Pyr (abc) + CO2 (d)                               |
| R29       | PEP (abc) + CO2 (d)                                      | <-> | OAA (abcd)                                        |
| R30       | AcCoA (ab)                                               | <-> | Ac (ab)                                           |
| R31       | DHAP (abc)                                               | <-> | Glyc3P (abc)                                      |
| R32       | Glyc3P (abc)                                             | ->  | Glyc (abc)                                        |
| R33       | Glyc (abc)                                               | ->  | HPA (abc)                                         |
| R34       | HPA (abc)                                                | ->  | PDO (abc)                                         |
| R35       | AKG (abcde)                                              | ->  | Glu (abcde)                                       |
| R36       | Glu (abcde)                                              | ->  | Gln (abcde)                                       |
| R37       | Glu (abcde)                                              | ->  | Pro (abcde)                                       |
| R38       | Glu (abcde) + CO2 (f) + Gln (ghijk) + Asp (lmno) + AcCoA | ->  | Arg (abcdef) + AKG (ghijk) + Fum (lmno) + Ac (pq) |

|     |                                                                                                                                                                                                                                          |     |                                      |
|-----|------------------------------------------------------------------------------------------------------------------------------------------------------------------------------------------------------------------------------------------|-----|--------------------------------------|
|     | (pq)                                                                                                                                                                                                                                     |     |                                      |
| R39 | OAA (abcd) + Glu (efghi)                                                                                                                                                                                                                 | ->  | Asp (abcd) + AKG (efghi)             |
| R40 | Asp (abcd)                                                                                                                                                                                                                               | ->  | Asn (abcd)                           |
| R41 | Pyr (abc) + Glu (defgh)                                                                                                                                                                                                                  | ->  | Ala (abc) + AKG (defgh)              |
| R42 | PG3 (abc) + Glu (defgh)                                                                                                                                                                                                                  | ->  | Ser (abc) + AKG (defgh)              |
| R43 | Ser (abc)                                                                                                                                                                                                                                | <-> | Gly (ab) + MEETHF (c)                |
| R44 | Gly (ab)                                                                                                                                                                                                                                 | <-> | CO2 (a) + MEETHF (b)                 |
| R45 | Thr (abcd)                                                                                                                                                                                                                               | ->  | Gly (ab) + AcCoA (cd)                |
| R46 | Ser (abc) + AcCoA (de)                                                                                                                                                                                                                   | ->  | Cys (abc) + Ac (de)                  |
|     | Asp (abcd) + Pyr (efg) + Glu                                                                                                                                                                                                             |     | LL_DAP (abcdgfe) + AKG (hijkl) +     |
| R47 | (hijkl) + SucCoA (mnop)                                                                                                                                                                                                                  | ->  | Suc (mnop)                           |
| R48 | LL_DAP (abcdefg)                                                                                                                                                                                                                         | ->  | Lys (abcdef) + CO2 (g)               |
| R49 | Asp (abcd)                                                                                                                                                                                                                               | ->  | Thr (abcd)                           |
|     | Asp (abcd) + METHF (e) + Cys                                                                                                                                                                                                             |     |                                      |
| R50 | (fgh) + SucCoA (ijkl)                                                                                                                                                                                                                    | ->  | Met (abcde) + Pyr (fgh) + Suc (ijkl) |
| R51 | Pyr (abc) + Pyr (def) + Glu (ghijk)                                                                                                                                                                                                      | ->  | Val (abcef) + CO2 (d) + AKG (ghijk)  |
|     | AcCoA (ab) + Pyr (cde) + Pyr                                                                                                                                                                                                             |     | Leu (abdghe) + CO2 (c) + CO2 (f) +   |
| R52 | (fgh) + Glu (ijklm)                                                                                                                                                                                                                      | ->  | AKG (ijklm)                          |
|     | Thr (abcd) + Pyr (efg) + Glu                                                                                                                                                                                                             |     |                                      |
| R53 | (hijkl)                                                                                                                                                                                                                                  | ->  | Ile (abfcdg) + CO2 (e) + AKG (hijkl) |
|     | PEP (abc) + PEP (def) + E4P (ghij)                                                                                                                                                                                                       |     | Phe (abcefg hij) + CO2 (d) + AKG     |
| R54 | + Glu (klmno)                                                                                                                                                                                                                            | ->  | (klmno)                              |
|     | PEP (abc) + PEP (def) + E4P (ghij)                                                                                                                                                                                                       |     | Tyr (abcefg hij) + CO2 (d) + AKG     |
| R55 | + Glu (klmno)                                                                                                                                                                                                                            | ->  | (klmno)                              |
|     | Ser (abc) + R5P (defgh) + PEP                                                                                                                                                                                                            |     |                                      |
|     | (ijk) + E4P (lmno) + PEP (pqr) +                                                                                                                                                                                                         |     | Trp (abcdklmnoj) + CO2 (i) + GAP     |
| R56 | Gln (stuvw)                                                                                                                                                                                                                              | ->  | (fgh) + Pyr (pqr) + Glu (stuvw)      |
|     | R5P (abcde) + FTHF (f) + Gln                                                                                                                                                                                                             |     | His (edcbaf) + AKG (ghijk) + Fum     |
| R57 | (ghijk) + Asp (lmno)                                                                                                                                                                                                                     | ->  | (lmno)                               |
| R58 | MEETHF (a)                                                                                                                                                                                                                               | ->  | METHF (a)                            |
| R59 | MEETHF (a)                                                                                                                                                                                                                               | ->  | FTHF (a)                             |
| R60 | Gluc.pre (abcdef)                                                                                                                                                                                                                        | ->  | G6P (abcdef)                         |
| R61 | Gluc.ext (abcdef)                                                                                                                                                                                                                        | ->  | G6P (abcdef)                         |
| R62 | Cit.ext (abcdef)                                                                                                                                                                                                                         | ->  | Cit (abcdef)                         |
| R63 | Glyc.ext (abc) + Dummy.ext                                                                                                                                                                                                               | <-> | Glyc (abc) + Dummy                   |
| R64 | PDO (abc)                                                                                                                                                                                                                                | ->  | PDO.ext (abc)                        |
| R65 | Ac (ab)                                                                                                                                                                                                                                  | ->  | Ac.ext (ab)                          |
| R66 | CO2 (a)                                                                                                                                                                                                                                  | ->  | CO2.ext (a)                          |
| R67 | 0.488*Ala + 0.281*Arg +<br>0.229*Asn + 0.229*Asp +<br>0.087*Cys + 0.25*Glu + 0.25*Gln<br>+ 0.582*Gly + 0.09*His +<br>0.276*Ile + 0.428*Leu +<br>0.326*Lys + 0.146*Met +<br>0.176*Phe + 0.21*Pro + 0.205*Ser<br>+ 0.241*Thr + 0.054*Trp + | ->  | 39.68*Biomass                        |

|     |                                                                                                                                                                                         |    |           |
|-----|-----------------------------------------------------------------------------------------------------------------------------------------------------------------------------------------|----|-----------|
| R68 | 0.131*Tyr + 0.402*Val +<br>0.205*G6P + 0.071*F6P +<br>0.754*R5P + 0.129*GAP +<br>0.619*PG3 + 0.051*PEP +<br>0.083*Pyr + 2.51*AcCoA +<br>0.087*AKG + 0.34*OAA +<br>0.443*MEETHF<br>Dummy | -> | Dummy.ext |
|-----|-----------------------------------------------------------------------------------------------------------------------------------------------------------------------------------------|----|-----------|

**Table S8: Mass Isotopomer Distribution (MID) results for the *E. coli* model with an aldolase error (see Table S7).**

| Mass Isotopomer | M0     | M1     | M2     | M3     | M4     | M5     | M6     | M7     | M8     | M9    |
|-----------------|--------|--------|--------|--------|--------|--------|--------|--------|--------|-------|
| AKG5            | 0.1957 | 0.2761 | 0.2773 | 0.1687 | 0.0661 | 0.0162 |        |        |        |       |
| AcCoA           | 0.5826 | 0.1785 | 0.2388 |        |        |        |        |        |        |       |
| Ala2            | 0.6084 | 0.1681 | 0.2236 |        |        |        |        |        |        |       |
| Ala3            | 0.5027 | 0.1837 | 0.1182 | 0.1953 |        |        |        |        |        |       |
| Asp2a           | 0.5064 | 0.3101 | 0.1836 |        |        |        |        |        |        |       |
| Asp2b           | 0.5064 | 0.3101 | 0.1836 |        |        |        |        |        |        |       |
| Asp3            | 0.3327 | 0.3728 | 0.2264 | 0.068  |        |        |        |        |        |       |
| Asp4            | 0.254  | 0.333  | 0.25   | 0.1305 | 0.0324 |        |        |        |        |       |
| Cit6            | 0.1264 | 0.2473 | 0.2767 | 0.2072 | 0.1026 | 0.034  | 0.0058 |        |        |       |
| E4P             | 0.3974 | 0.2889 | 0.0608 | 0.1644 | 0.0884 |        |        |        |        |       |
| Glu4            | 0.2496 | 0.3347 | 0.2557 | 0.1292 | 0.0308 |        |        |        |        |       |
| Glu5            | 0.1963 | 0.2759 | 0.2771 | 0.1685 | 0.066  | 0.0162 |        |        |        |       |
| Gly1            | 0.71   | 0.29   |        |        |        |        |        |        |        |       |
| Gly2            | 0.636  | 0.1319 | 0.2321 |        |        |        |        |        |        |       |
| Ile5a           | 0.1939 | 0.2766 | 0.2779 | 0.1691 | 0.0662 | 0.0163 |        |        |        |       |
| Ile5b           | 0.1939 | 0.2766 | 0.2779 | 0.1691 | 0.0662 | 0.0163 |        |        |        |       |
| Leu5            | 0.2194 | 0.2546 | 0.273  | 0.1655 | 0.067  | 0.0204 |        |        |        |       |
| Mal4            | 0.254  | 0.3331 | 0.25   | 0.1305 | 0.0325 |        |        |        |        |       |
| Met4a           | 0.2331 | 0.3608 | 0.2703 | 0.1154 | 0.0204 |        |        |        |        |       |
| Met4b           | 0.2331 | 0.3608 | 0.2703 | 0.1154 | 0.0204 |        |        |        |        |       |
| Met5            | 0.178  | 0.3094 | 0.2748 | 0.1663 | 0.0618 | 0.0097 |        |        |        |       |
| Phe2            | 0.6693 | 0.0853 | 0.2454 |        |        |        |        |        |        |       |
| Phe8a           | 0.178  | 0.1748 | 0.1937 | 0.1942 | 0.1148 | 0.0853 | 0.0402 | 0.0136 | 0.0053 |       |
| Phe8b           | 0.178  | 0.1748 | 0.1937 | 0.1942 | 0.1148 | 0.0853 | 0.0402 | 0.0136 | 0.0053 |       |
| Phe9            | 0.1706 | 0.165  | 0.1352 | 0.2052 | 0.1316 | 0.085  | 0.0654 | 0.0246 | 0.0123 | 0.005 |
| Pyr3            | 0.4709 | 0.1937 | 0.1267 | 0.2087 |        |        |        |        |        |       |
| Ser2a           | 0.5536 | 0.3078 | 0.1386 |        |        |        |        |        |        |       |
| Ser2b           | 0.6469 | 0.1166 | 0.2365 |        |        |        |        |        |        |       |
| Ser2c           | 0.5536 | 0.3078 | 0.1386 |        |        |        |        |        |        |       |
| Suc4            | 0.254  | 0.3331 | 0.25   | 0.1305 | 0.0325 |        |        |        |        |       |
| Thr3            | 0.3327 | 0.3728 | 0.2264 | 0.068  |        |        |        |        |        |       |
| Thr4            | 0.254  | 0.333  | 0.25   | 0.1305 | 0.0324 |        |        |        |        |       |
| Tyr2            | 0.6723 | 0.0847 | 0.243  |        |        |        |        |        |        |       |
| Val4            | 0.3398 | 0.2077 | 0.3102 | 0.0852 | 0.0571 |        |        |        |        |       |
| Val5            | 0.2745 | 0.1968 | 0.2209 | 0.1905 | 0.0675 | 0.0499 |        |        |        |       |

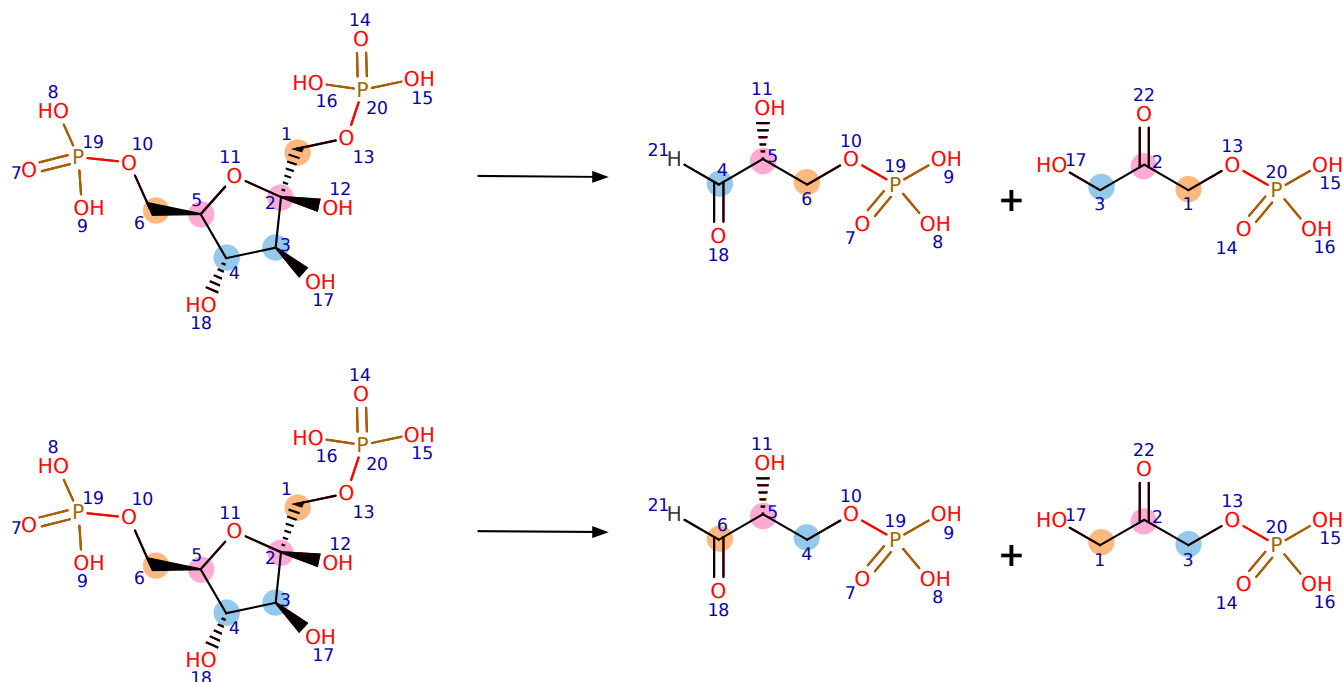

Figure S1: Upper Part: In the aldolase reaction, fructose-1,6-bisphosphate is converted to glyceraldehyde-3-phosphate and dihydroxyacetone phosphate. The 1st and 6th carbon atoms of fructose-1,6-bisphosphate are the phosphate carbons in their respective metabolites. Lower Part: In the second reaction an error is introduced that swaps the 1st and 3rd carbon atom of each metabolite, resulting in the 3rd and 4th carbon being the phosphate carbon.
